# Supplementary material
Source: PubMed Central journal article supplement (PMC3576538)
Supplement: mmc1.pdf [file mmc1.pdf]

# **Osmotic Challenge Drives Rapid and Reversible Chromatin Condensation in Chondrocytes**

Jerome Irianto,<sup>†\*</sup> Joe Swift,<sup>‡</sup> Rui P. Martins,<sup>†</sup> Graham D. McPhail,<sup>§</sup> Martin M. Knight,<sup>†</sup> Dennis E. Discher,<sup>‡</sup> and David A. Lee<sup>†</sup>

<sup>†</sup>Institute of Bioengineering, School of Engineering and Material Science, Queen Mary, University of London, London, UK; <sup>‡</sup>Biophysical Engineering Laboratory, School of Engineering and Applied Science, University of Pennsylvania, Philadelphia, PA; and <sup>§</sup>Division of Cellular Pathology, Barts and the London NHS Trust, Royal London Hospital, London, UK

## **Supporting Material**

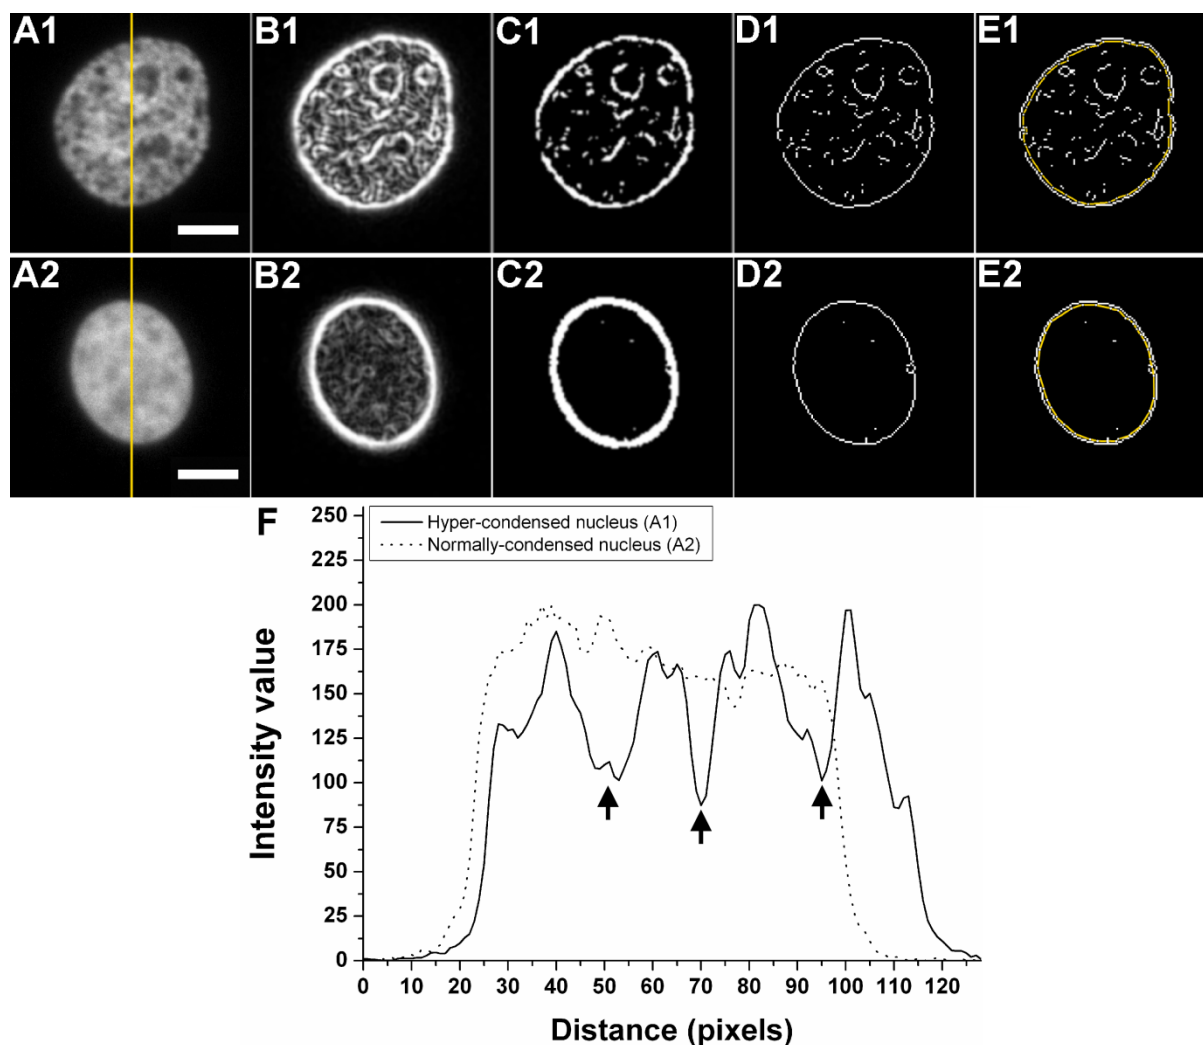

FIGURE S1 Monolayer cultured chondrocyte nuclei with hyper- (A1) and normally- (A2) condensed chromatin as the source images, both with a region of interest drawn across the nuclei (yellow). Image after Sobel algorithm (B), Sobel image post-thresholding (C), thresholded image post-thinning morphological operation (D), region of interest (yellow) showing the inner part of the nucleus (E). From this quantification method, the nucleus with hyper-condensed chromatin has an chromatin condensation parameter of 4.86%, whereas the nucleus without hyper-condensed chromatin has an chromatin condensation parameter of 0.16%. (F) The intensity profile across the nucleus with hyper- (A1, —) and normally- (A2, ..... ) condensed chromatin, arrows showing the intensity dips (Bar: 5  $\mu$ m).

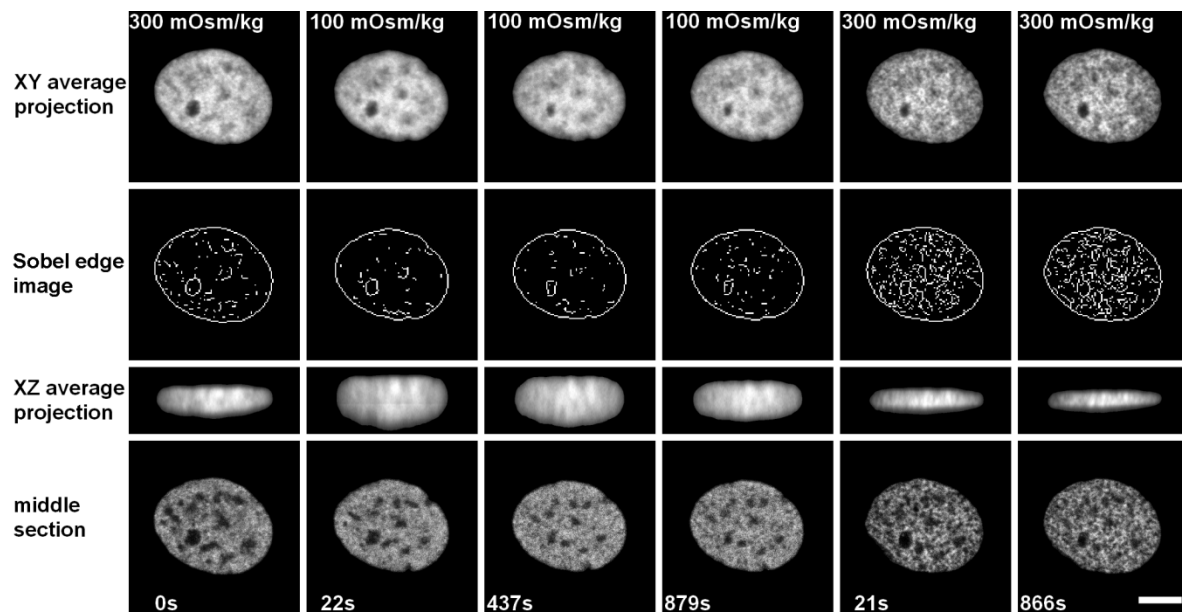

FIGURE S2 Images of monolayer cultured chondrocytes expressing H2B-GFP fusion-protein in an isoosmotic environment (300 mOsm/kg), followed by hypoosmotic challenge (100 mOsm/kg), which was then brought back to the isoosmotic conditions. Images were thresholded using the Iterative Self Organizing Data algorithm (Bar: 5  $\mu$ m).

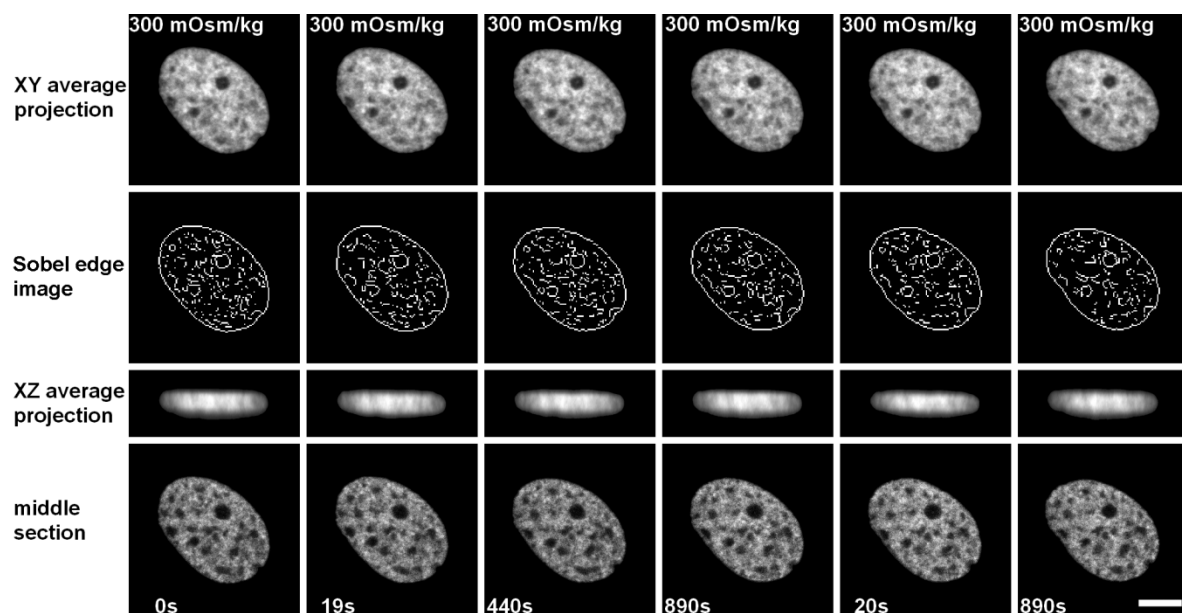

FIGURE S3 Images of monolayer cultured chondrocytes expressing H2B-GFP fusion-protein in an isoosmotic environment (300 mOsm/kg), followed by isoosmotic challenge (300 mOsm/kg), which was then brought back to the isoosmotic conditions. Images were thresholded using the Iterative Self Organizing Data algorithm (Bar: 5  $\mu$ m).

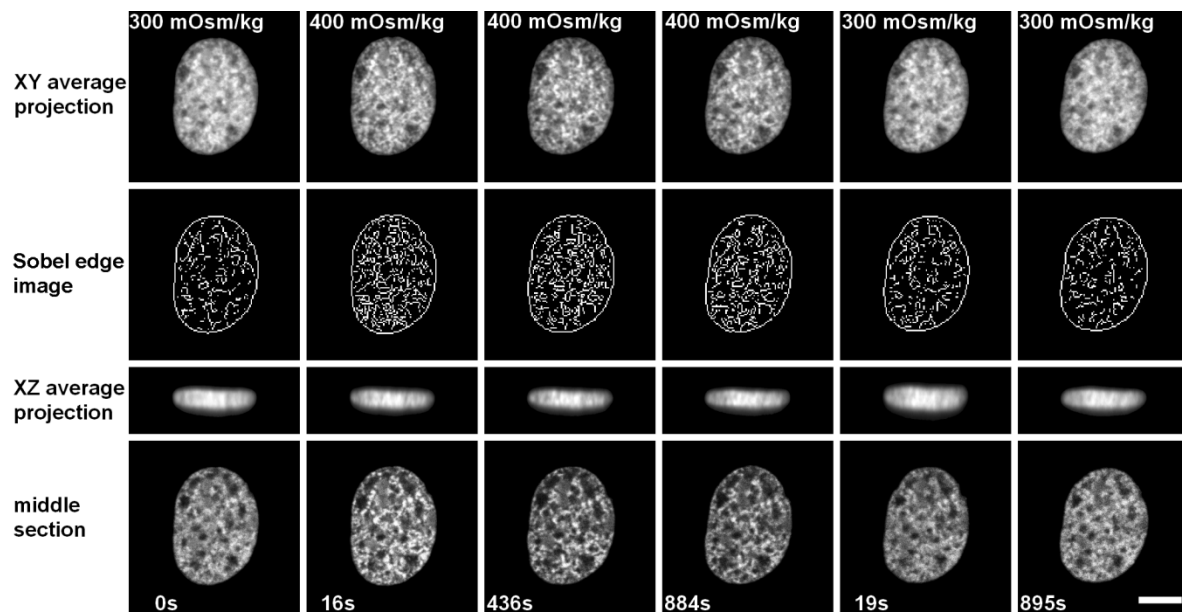

FIGURE S4 Images of monolayer cultured chondrocytes expressing H2B-GFP fusion-protein in an isoosmotic environment (300 mOsm/kg), followed by hyperosmotic challenge (400 mOsm/kg), which was then brought back to the isoosmotic conditions. Images were thresholded using the Iterative Self Organizing Data algorithm (Bar: 5  $\mu$ m).

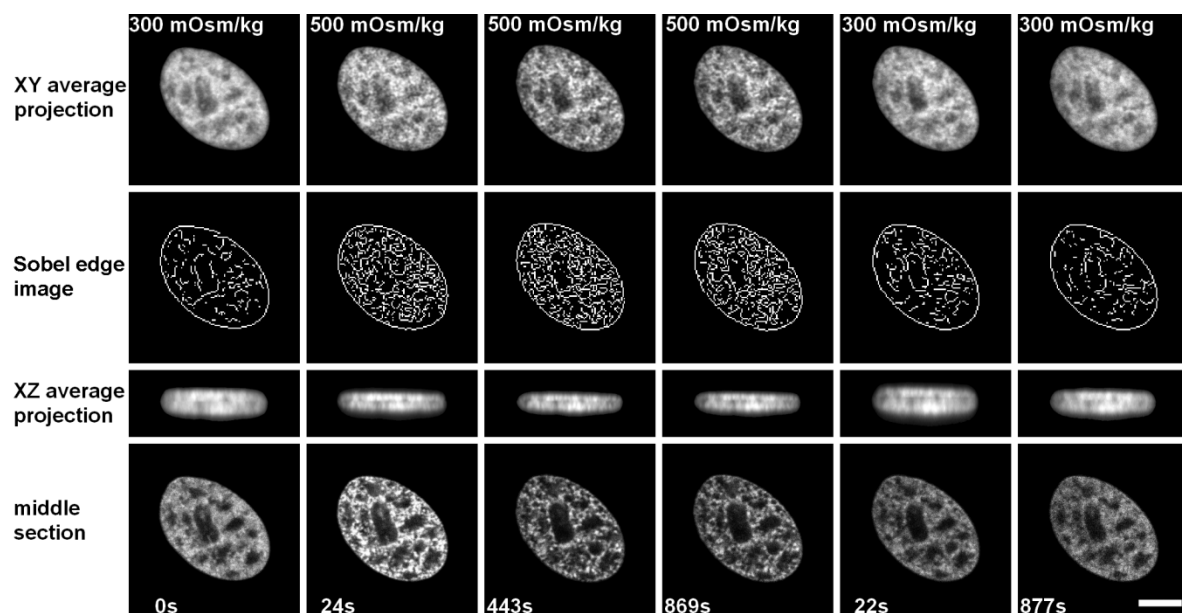

FIGURE S5 Images of monolayer cultured chondrocytes expressing H2B-GFP fusion-protein in an isoosmotic environment (300 mOsm/kg), followed by hyperosmotic challenge (500 mOsm/kg), which was then brought back to the isoosmotic conditions. Images were thresholded using the Iterative Self Organizing Data algorithm (Bar: 5  $\mu$ m).

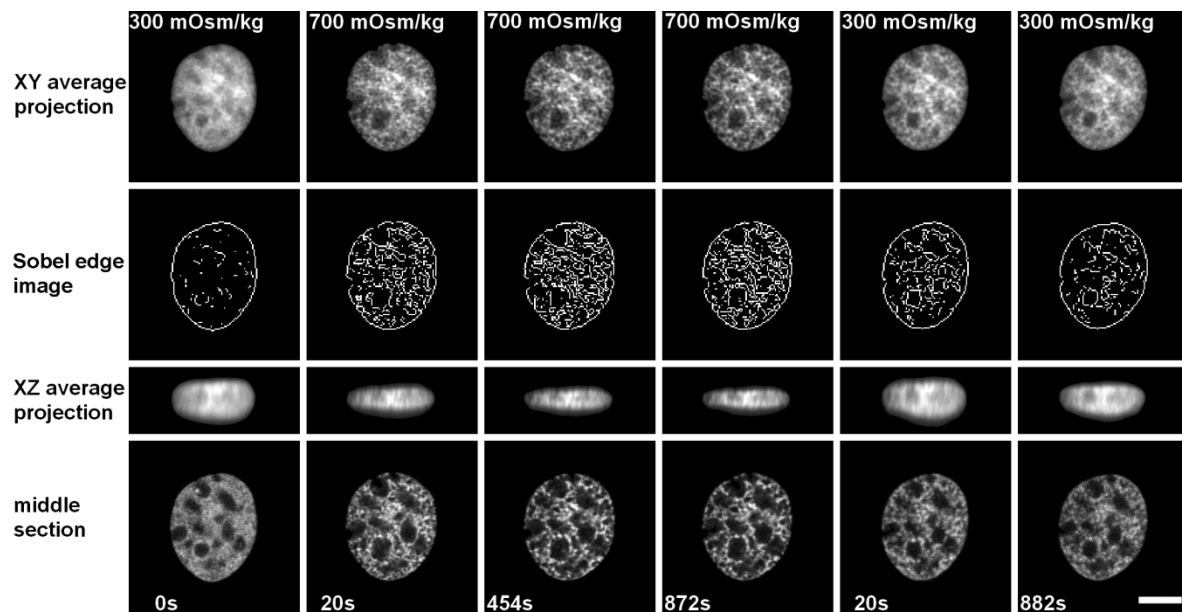

FIGURE S6 Images of monolayer cultured chondrocytes expressing H2B-GFP fusion-protein in an isoosmotic environment (300 mOsm/kg), followed by hyperosmotic challenge (700 mOsm/kg), which was then brought back to the isoosmotic conditions. Images were thresholded using the Iterative Self Organizing Data algorithm (Bar: 5  $\mu$ m).

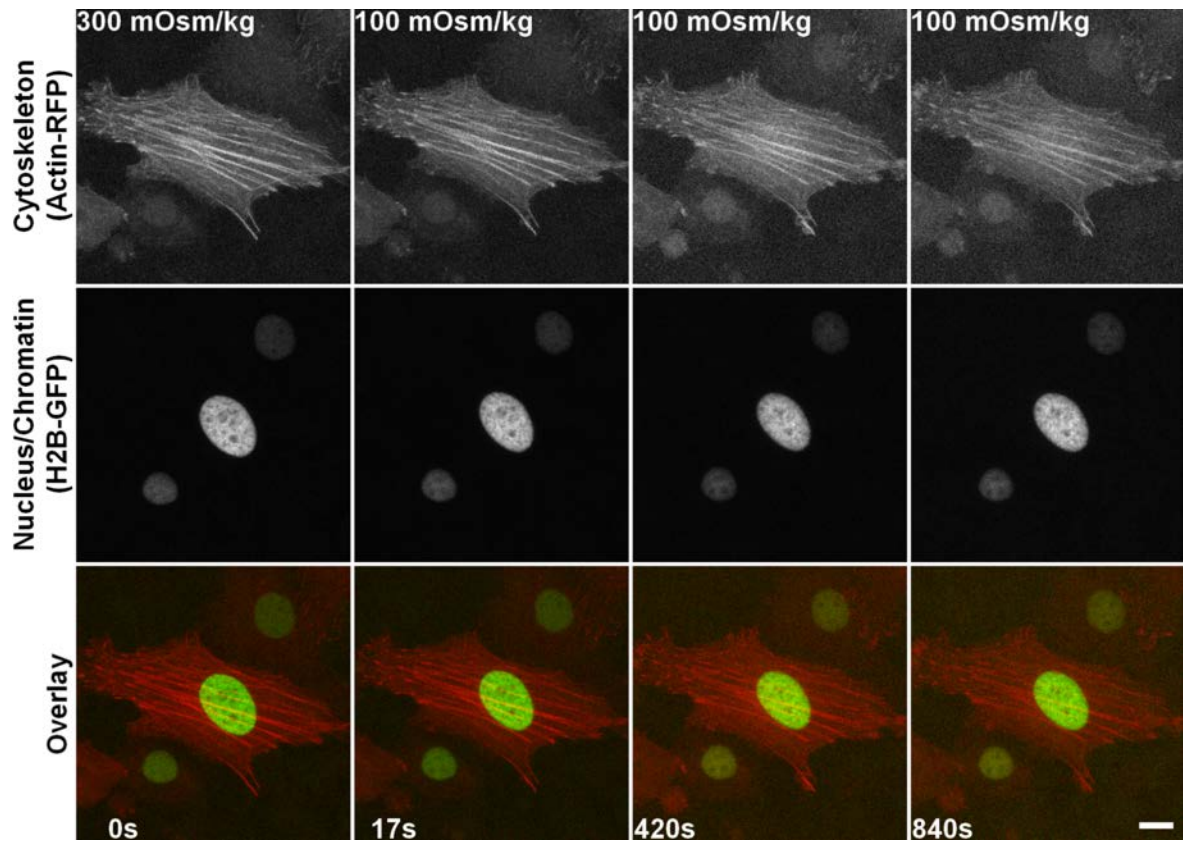

FIGURE S7 Average projection images of monolayer cultured chondrocytes expressing actin-RFP and H2B-GFP fusion-protein in an isoosmotic environment (300 mOsm/kg), followed with hypoosmotic challenge (100 mOsm/kg) (Bar: 10  $\mu$ m).

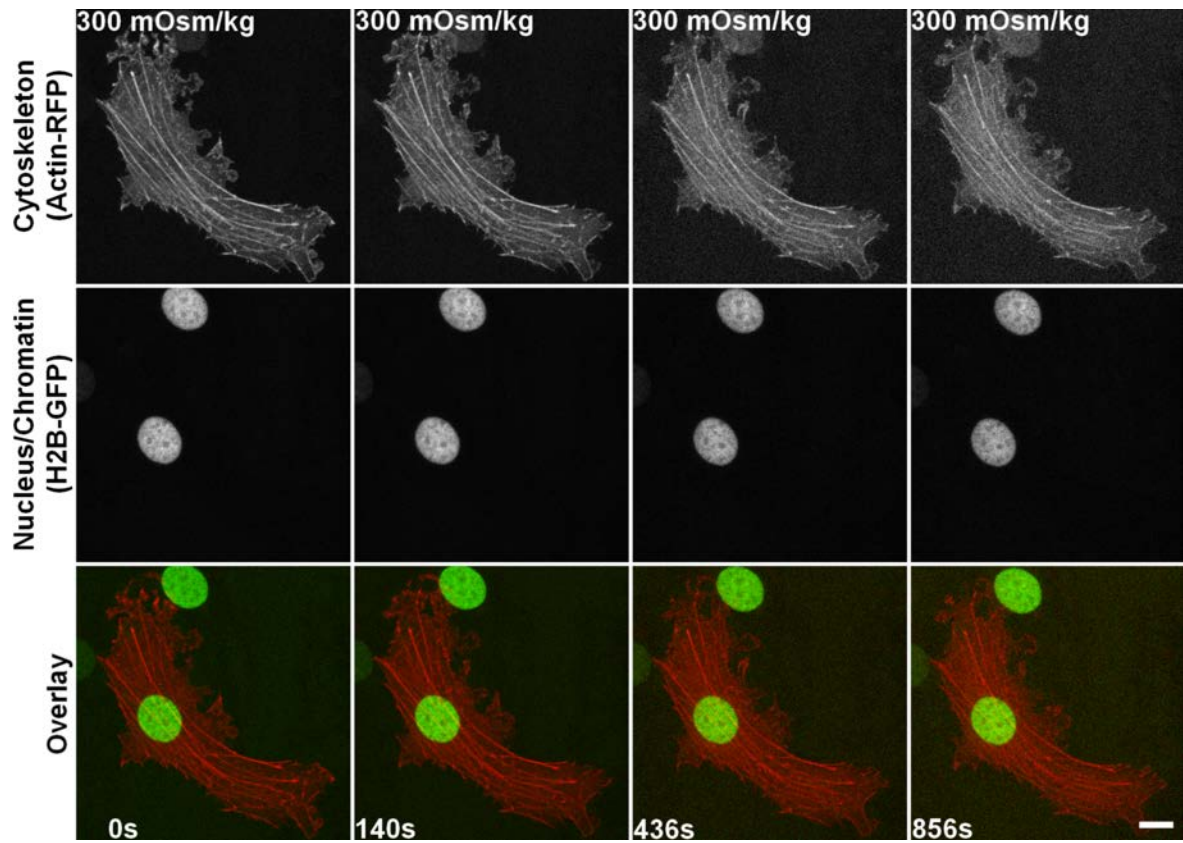

FIGURE S8 Average projection images of monolayer cultured chondrocytes expressing actin-RFP and H2B-GFP fusion-protein in an isoosmotic environment (300 mOsm/kg), followed with isoosmotic challenge (300 mOsm/kg) (Bar: 10  $\mu$ m).

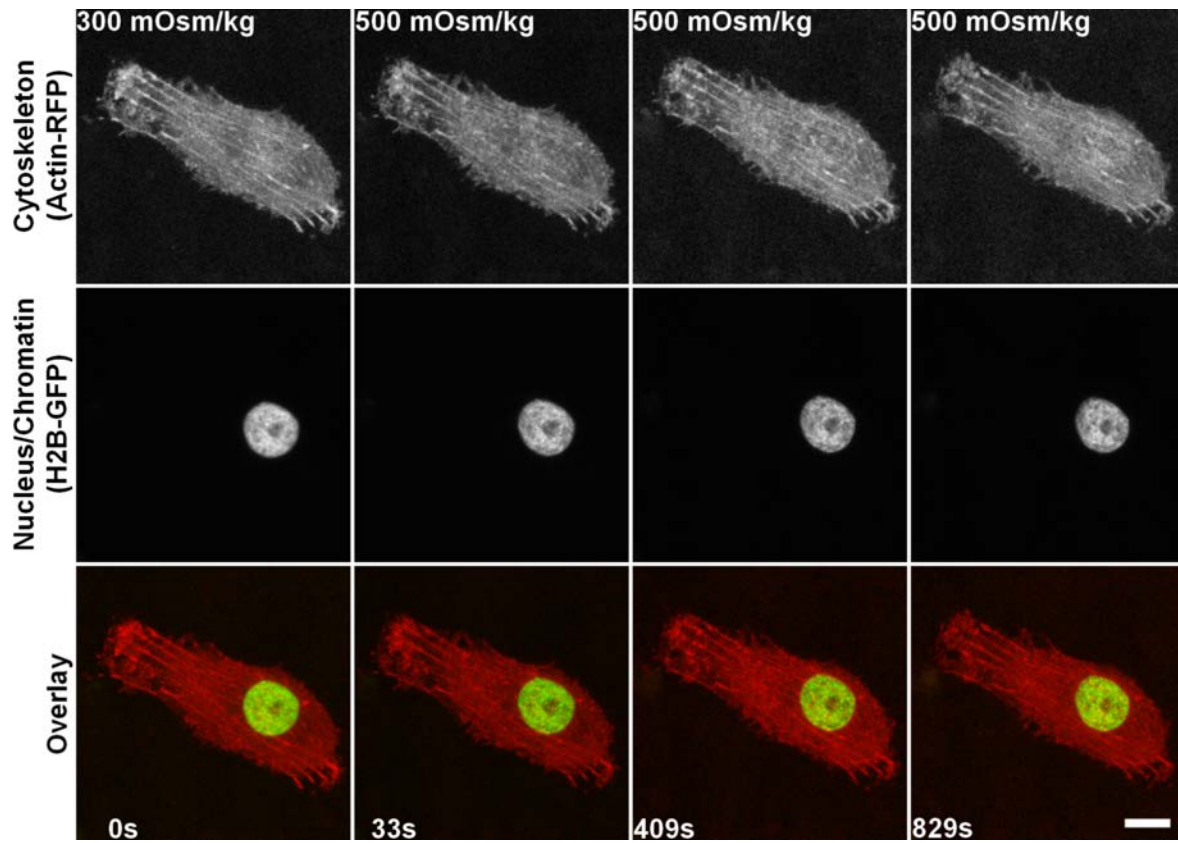

FIGURE S9 Average projection images of monolayer cultured chondrocytes expressing actin-RFP and H2B-GFP fusion-protein in an isoosmotic environment (300 mOsm/kg), followed with hyperosmotic challenge (500 mOsm/kg) (Bar: 10  $\mu$ m).
